# Supplementary material
Source: Springer Nature journal article supplement (https://www.springermedizin.de/resource/supplementary/12936_2011_1930_MOESM8_ESM.pdf/9542076)

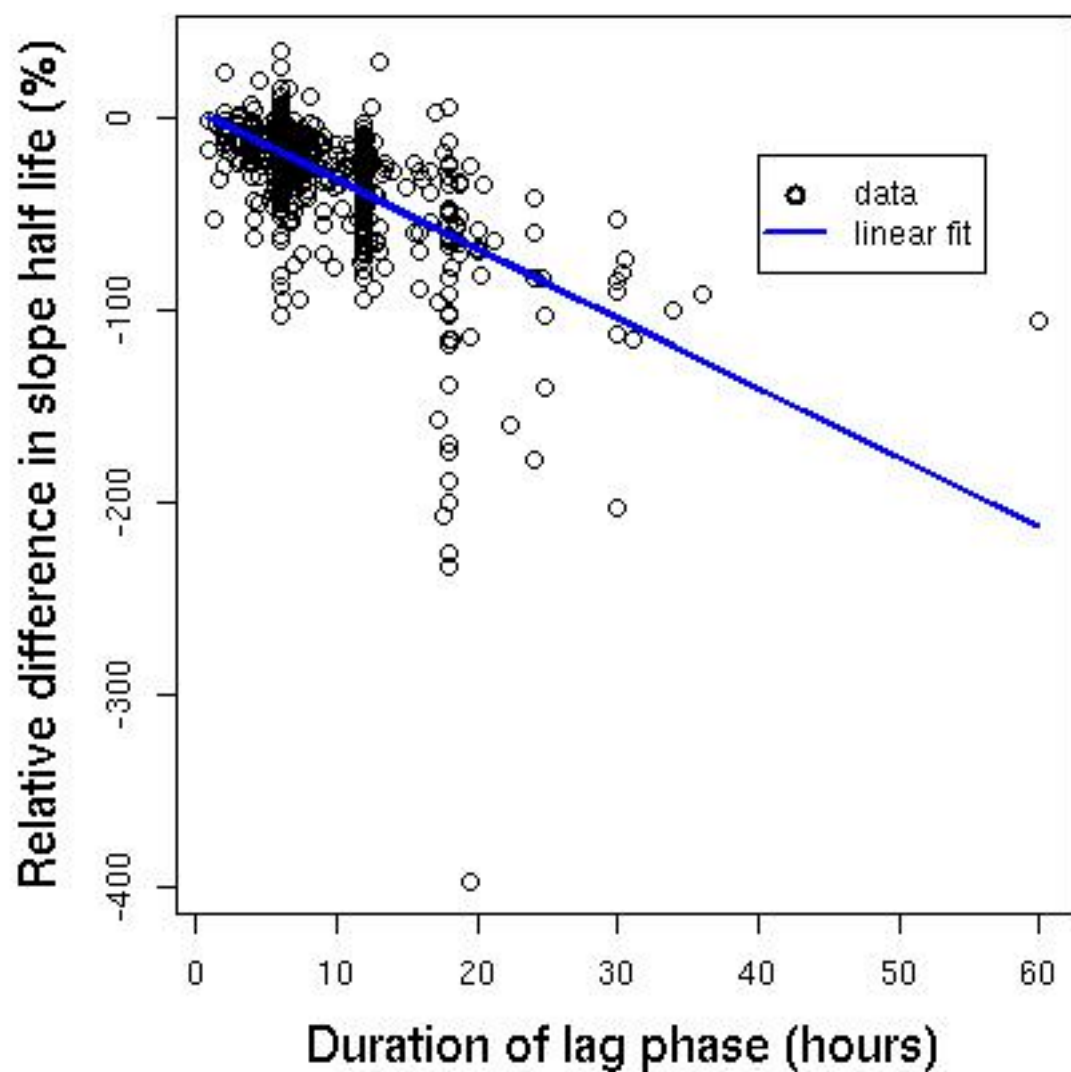

Supplement: MOESM8 [file 9542076]
